# Supplementary material for: FBXL19-AS1 exerts oncogenic function by sponging miR-431-5p to regulate RAF1 expression in lung cancer
Source: PubMed Central journal article supplement (PMC6350044; doi:10.1042/bsr20181804), 2019-01-25
Supplement: BSR-2018-1804_supp.pdf [file BSR-2018-1804_supp.pdf]

| Target gene | Representative transcript | Gene name                                   | Representative miRNA |
|-------------|---------------------------|---------------------------------------------|----------------------|
| CD44        | ENST00000278386.6         | CD44 molecule (Indian blood group)          | hsa-miR-431-5p       |
| DSCR4       | ENST00000398948.1         | Down syndrome critical region gene 4        | hsa-miR-431-5p       |
| EGFR        | ENST00000275493.2         | epidermal growth factor receptor            | hsa-miR-431-5p       |
| CD274       | ENST00000381573.4         | CD274 molecule                              | hsa-miR-431-5p       |
| RPS15A      | ENST00000576436.1         | ribosomal protein S15a                      | hsa-miR-431-5p       |
| CD34        | ENST00000356522.4         | CD34 molecule                               | hsa-miR-431-5p       |
| ZEB1        | ENST00000361642.5         | zinc finger E-box binding homeobox 1        | hsa-miR-431-5p       |
| SMAD4       | ENST00000398417.2         | SMAD family member 4                        | hsa-miR-431-5p       |
| HHIP        | ENST00000296575.3         | hedgehog interacting protein                | hsa-miR-431-5p       |
| SRPX2       | ENST00000373004.3         | sushi-repeat containing protein, X-linked 2 | hsa-miR-431-5p       |

|        |                       |                                                     |                    |
|--------|-----------------------|-----------------------------------------------------|--------------------|
| NCL    | ENST00000322723.<br>4 | nucleolin                                           | hsa-miR-431-5<br>p |
| NOX5   | ENST00000260364.<br>5 | NADPH oxidase, EF-hand calcium<br>binding domain 5  | hsa-miR-431-5<br>p |
| EIF4E  | ENST00000450253.<br>2 | eukaryotic translation initiation<br>factor 4E      | hsa-miR-431-5<br>p |
| TGFA   | ENST00000295400.<br>6 | transforming growth factor, alpha                   | hsa-miR-431-5<br>p |
| CDK6   | ENST00000265734.<br>4 | cyclin-dependent kinase 6                           | hsa-miR-431-5<br>p |
| CD47   | ENST00000361309.<br>5 | CD47 molecule                                       | hsa-miR-431-5<br>p |
| IL8    | ENST00000307407.<br>3 | interleukin 8                                       | hsa-miR-431-5<br>p |
| RAF1   | ENST00000251849.<br>4 | v-raf-1 murine leukemia viral<br>oncogene homolog 1 | hsa-miR-431-5<br>p |
| FAM65B | ENST00000259698.<br>4 | family with sequence similarity 65,<br>member B     | hsa-miR-431-5<br>p |

Supplementary table S1

The potential target genes associated with angiogenesis for miR-431-5p
